# Supplementary material for: Stable bifunctional ZnII-based sensor toward acetylacetone and l-histidine via a fluorescence red shift and turn-on effect
Source: Royal Society of Chemistry journal article supplement (doi:10.1039/d2ce00026a), 2022-01-01
Supplement: d2ce00026a1.pdf [file d2ce00026a1.pdf]

## ***Electronic Supplementary Information (ESI)***

### **Stable bifunctional Zn<sup>II</sup>-based sensor toward acetylacetone and L-histidine by a fluorescence red shift and turn-on effect**

**Shu-Li Yao, Hui Xu, Teng-Fei Zheng, Yan Peng, Sui-Jun Liu,\* Jing-Lin Chen and He-Rui Wen\***

School of Chemistry and Chemical Engineering, Jiangxi Provincial Key Laboratory of Functional Molecular Materials Chemistry, Jiangxi University of Science and Technology, Ganzhou 341000, Jiangxi Province, P.R. China

---

\*Corresponding authors. E-mail: sjliu@jxust.edu.cn (S.-J. Liu), wenherui63@163.com (H.-R. Wen). Tel: +86-797-8312204, +86-797-8312289.

**Table S1.** Selected bond lengths (Å) and angles (°) for **JXUST-15**.<sup>a</sup>

|                        |            |                        |            |
|------------------------|------------|------------------------|------------|
| Zn1—O1                 | 1.958(13)  | Zn1—N1 <sup>i</sup>    | 2.0280(17) |
| Zn1—N1                 | 2.0280(17) | Zn1—O1 <sup>i</sup>    | 1.958(13)  |
| O1—Zn1—N1              | 113.9(4)   | N1—Zn1—N1 <sup>i</sup> | 95.86(10)  |
| O1—Zn1—N1 <sup>i</sup> | 114.9(3)   |                        |            |

<sup>a</sup>Symmetry code: (i)  $-x+1/2, y, -z+1/2$ .

**Table S2.** SHAPE analysis of Zn<sup>II</sup> ion in **JXUST-15**.

| ion        | label  | shape                     | symmetry | distortion( $\tau$ ) |
|------------|--------|---------------------------|----------|----------------------|
| <b>Zn1</b> | SP-4   | Square                    | $D_{4h}$ | 25.798               |
|            | T-4    | Tetrahedron               | $T_d$    | <b>1.919</b>         |
|            | SS-4   | Seesaw                    | $C_{2v}$ | 6.576                |
|            | vTBPY- | Vacant trigonal bipyramid | $C_{3v}$ | 4.412                |

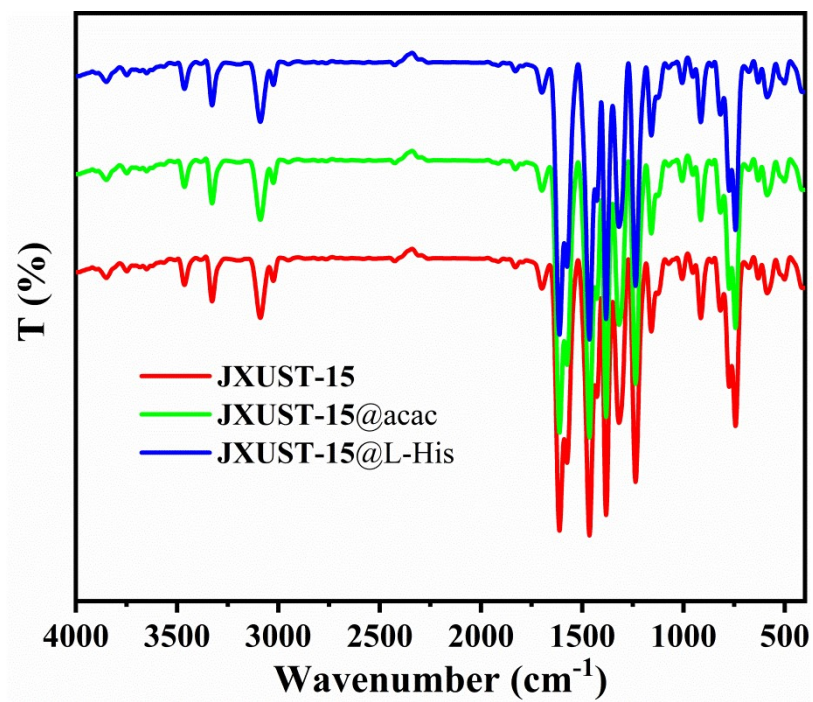

**Fig. S1.** IR spectra of JXUST-15, JXUST-15@acac and JXUST-15@L-His at room temperature.

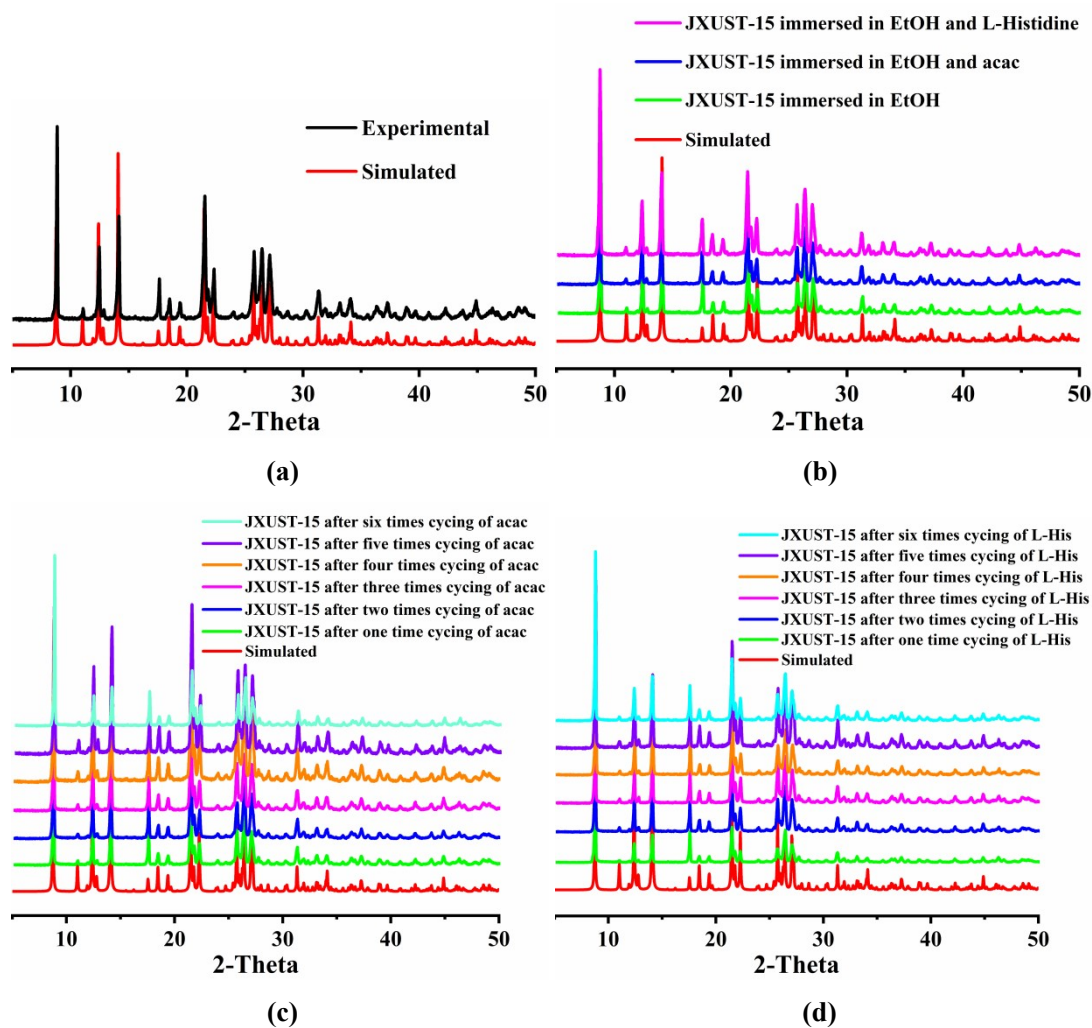

**Fig. S2.** (a) The simulated and as-synthesized PXRD patterns of **JXUST-15**; (b) PXRD patterns of samples immersed in EtOH, EtOH with acac or L-His solution for 24 h of **JXUST-15**; (c) PXRD patterns of **JXUST-15** after recycling six times of acac with EtOH solution; (d) PXRD patterns of **JXUST-15** after recycling six times of L-His with EtOH solution.

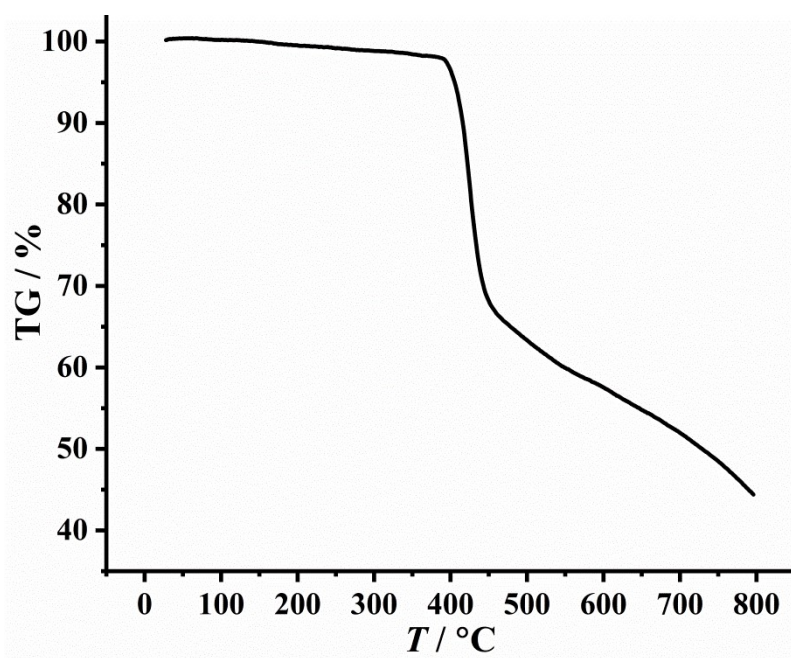

**Fig. S3.** The TGA curve of **JXUST-15** under N<sub>2</sub> atmosphere from room temperature to 800 °C.

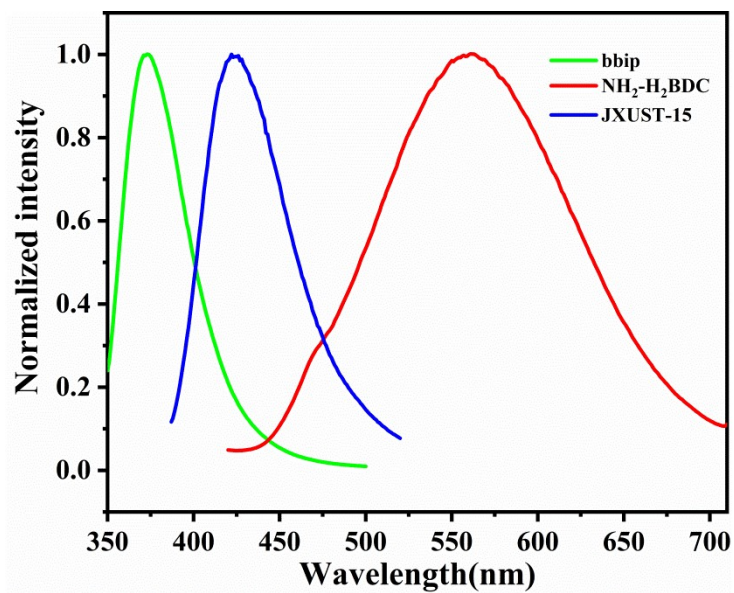

**Fig. S4.** The solid emission spectra of bbip, NH<sub>2</sub>-H<sub>2</sub>BDC and JXUST-15.

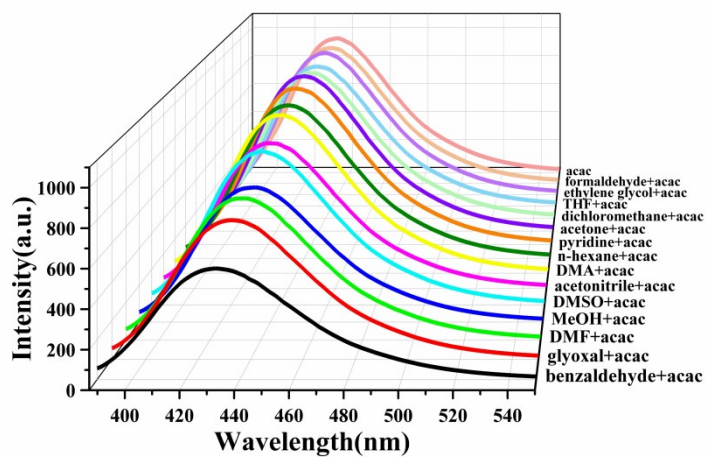

(a)

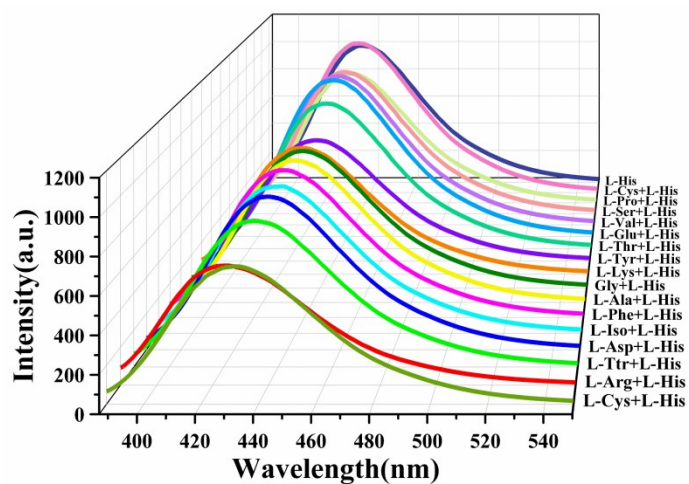

(b)

**Fig. S5.** The fluorescence response of JXUST-15 dispersed in EtOH suspension with acac and other organic molecules (a) and with L-His and other amino acids (b).

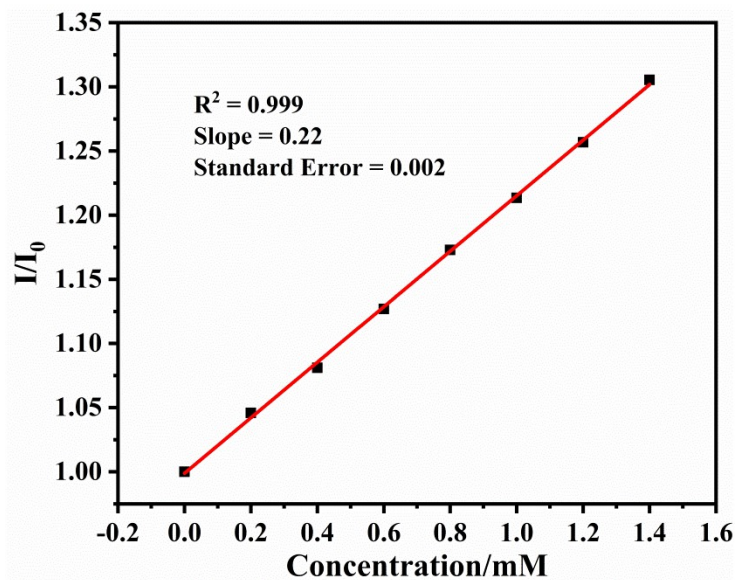

(a)

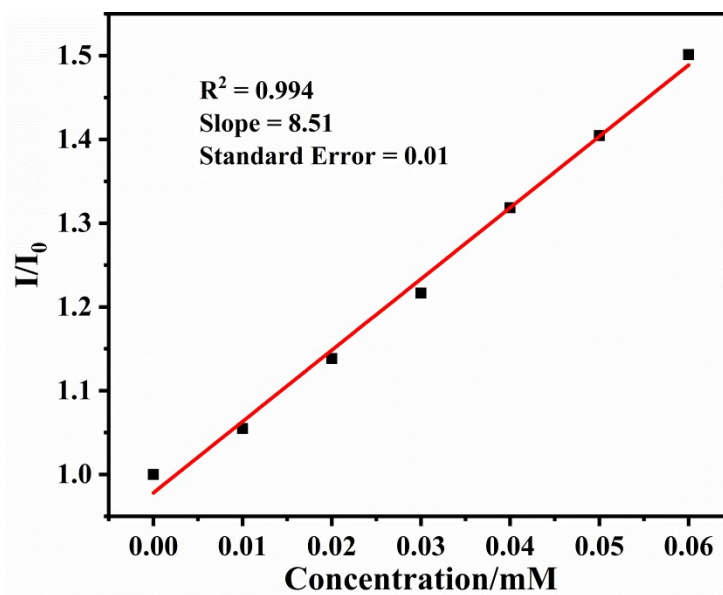

(b)

**Fig. S6.** The correlation between fluorescence intensity ratio  $I/I_0$  and the concentration of acac (a) and L-His (b) of JXUST-15.



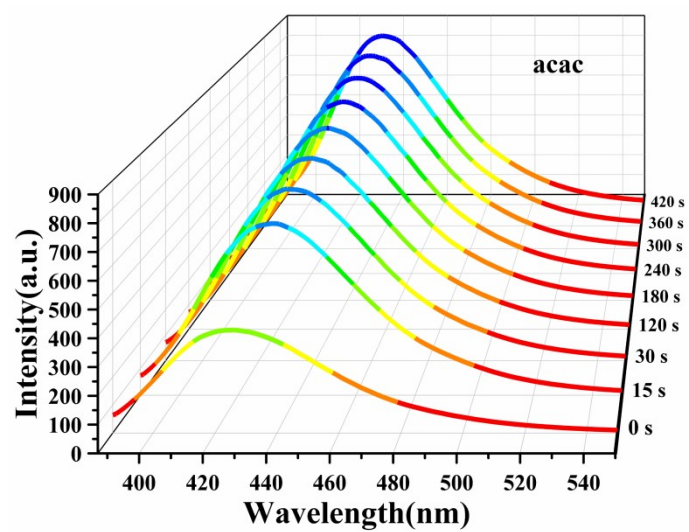

(a)

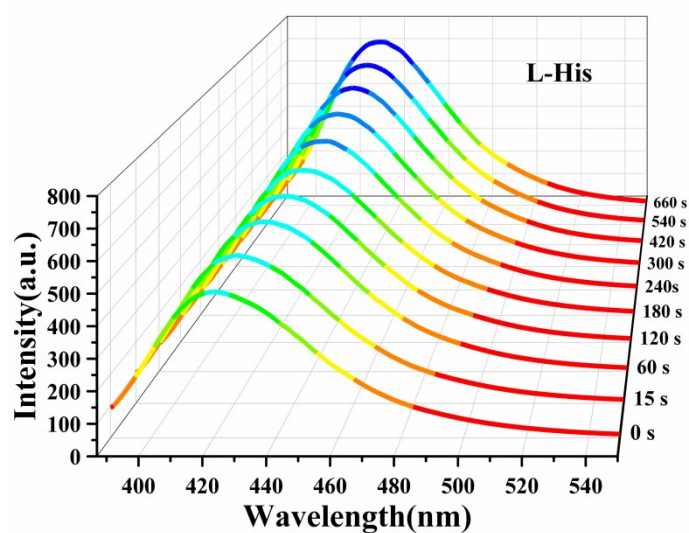

(b)

**Fig. S7.** Time-dependent fluorescence emission spectra of **JXUST-15** in EtOH suspension with 5  $\mu\text{L}$  acac (a) and 5  $\mu\text{L}$  L-His with the concentration of 0.1 M (b) ( $\lambda_{\text{ex}} = 367 \text{ nm}$ ).

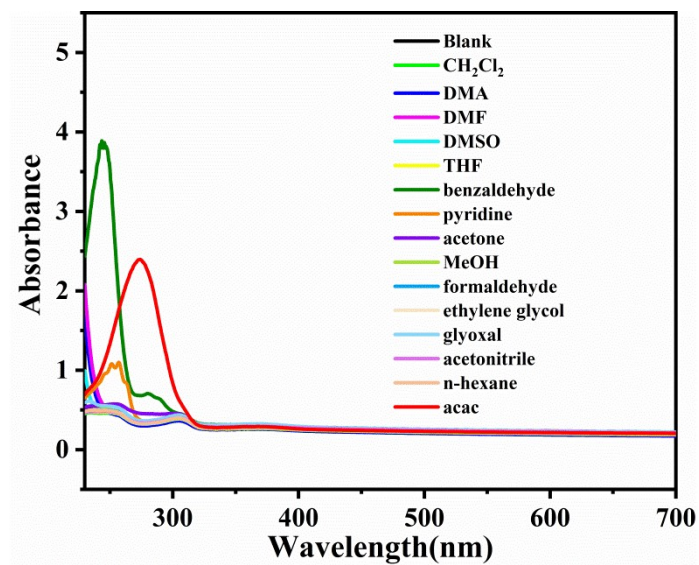

(a)

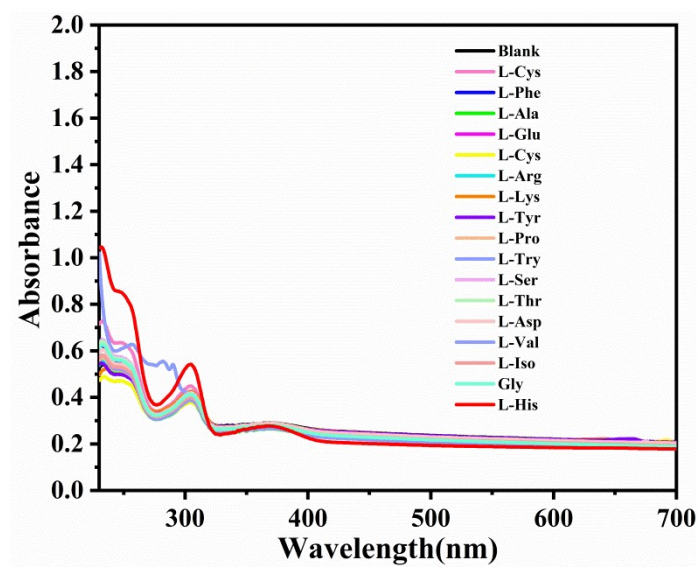

(b)

**Fig. S8.** The UV-Vis absorption spectra of **JXUST-15** and **JXUST-15** upon the addition of (a) different organic molecules and (b) amino-acid solutions.

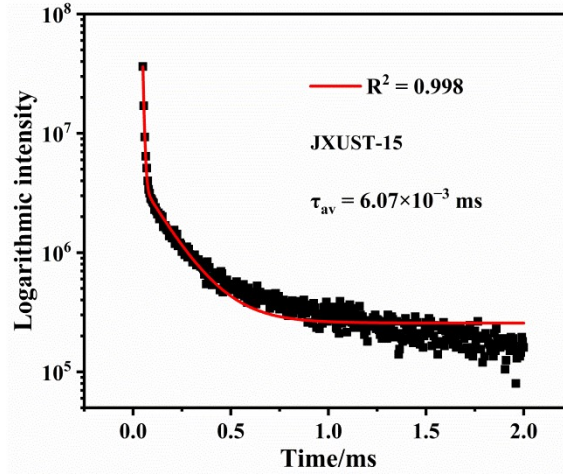

(a)

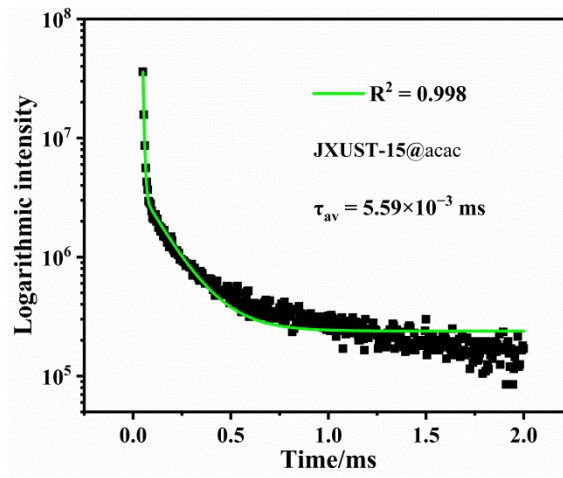

(b)

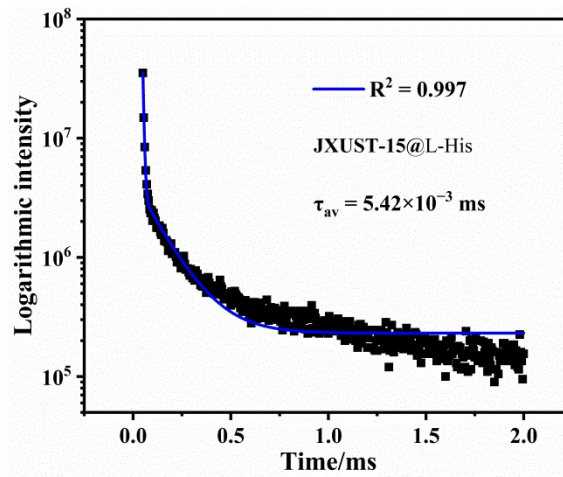

(c)

**Fig. S9.** The luminescence decay curves of (a) **JXUST-15**, (b) **JXUST-15@acac** and (c) **JXUST-15@L-His** at room temperature ( $\lambda_{\text{ex}} = 367 \text{ nm}$  and  $\lambda_{\text{em}} = 425 \text{ nm}$ ).
